# Supplementary material for: Remarkable lignin degradation in paper wastewaters over Fe2O3/γ-Al2O3 catalysts using the catalytic wet peroxide oxidation method
Source: Royal Society of Chemistry journal article supplement (doi:10.1039/c7ra05696f), 2017-01-01
Supplement: c7ra05696f1.pdf [file c7ra05696f1.pdf]

**Remarkable deep de-lignin in paper wastewaters over Fe<sub>2</sub>O<sub>3</sub>/γ-Al<sub>2</sub>O<sub>3</sub> Catalysts  
with catalytic wet peroxide oxidation method**

Di Wu,<sup>a</sup> Zhen Hu,<sup>a</sup> Xuqi Zhang,<sup>a</sup> Cuiran Zhang,<sup>a</sup> Kai Sun,<sup>b</sup> Shuxiang Lu,<sup>a\*</sup>

<sup>a</sup> College of Chemical Engineering and Materials Science, Tianjin University of Science and Technology, Tianjin 300457, People's Republic of China

<sup>b</sup> School of Environment and Energy, South China University of Technology, Guangzhou 510641, People's Republic of China

\* Corresponding author: Tel.: +86 22 60601157; fax: +86 22 60600030.

E-mail address : [lshx @tust.edu.cn](mailto:lshx@tust.edu.cn)

The UV-Vis absorption spectra of lignin under the initial pH is 9.0, reactions temperature is 75 °C. Exploring the different reaction times and the results are shown in Fig.S1. The intensity of absorption is reduced in the entire wavelength from 200 to 340 nm as the reaction time increase. In a separate experiment the absorbance at 280 nm plotted against the concentration of lignin give a linear curve showing that the absorption measurement offers a convenient method to evaluate the degradation of lignin.

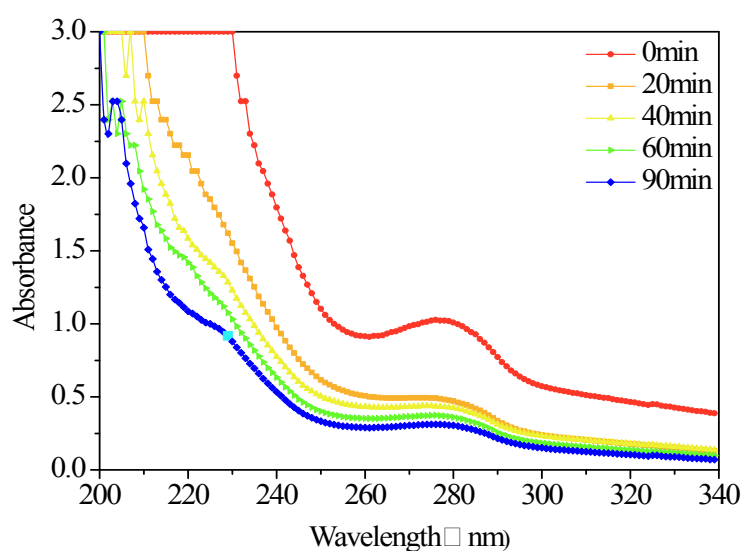

**Fig. S1.** UV-vis absorption spectra of lignin at different reaction times.

The experiment of the Oxidation of lignin have been test without  $H_2O_2$ , as shown in Fig.S2 Catalyst surface has certain adsorption, but when hydrogen peroxide oxidation degradation of lignin is even more obvious.

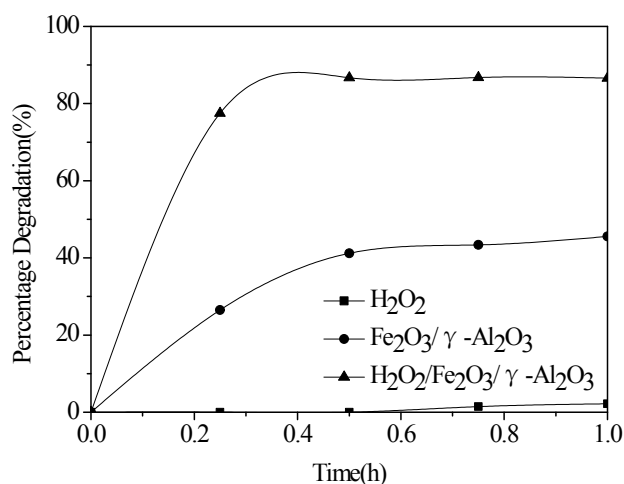

**Fig. S2.** Effect of catalyst adsorption and only oxidant (catalyst dose 6g/L; concentration of  $H_2O_2$  6.396 mM; pH=9; T=348

The experiment of the Oxidation of lignin have been test without  $H_2O_2$ , As shown in Fig. S2 Catalyst surface has certain adsorption, but when hydrogen peroxide oxidation degradation of lignin is even more obvious. We also test the degradation of lignin by only  $H_2O_2$ , and found almost no degradation by only oxidation.
